# Supplementary material
Source: HighWire-hosted journal article supplement (https://bmjopen.bmj.com/content/10/10/e035883)
Supplement: inline-supplementary-material-2 [file inline-supplementary-material-2.pdf]

**S2 List of variables and covariables of interest**

- age at inclusion
- urgency at onset
- urinary frequency (per day and night) at baseline
- dysuria at baseline
- suprapubic/lower abdominal/tummy pain at baseline
- loin pain at baseline
- fever at baseline
- smelly urine at baseline
- impairment or restriction of daily activities due to UTI
- C-reactive Proteine (CRP) at baseline
- leukocytes in urine at baseline
- erythrocytes in urine at baseline
- nitrite in urine at baseline
- urine culture results at baseline
- bacterial strains in urine at baseline
- urine sediment at baseline
- bladder incubation time at baseline
- antibiotic resistance
- duration of UTI symptoms at onset
- clinical recovery (symptoms resolution)
- dysuria at days 2 / 3-7
- frequency at days 2 / 3-7
- suprapubic/lower abdominal/tummy pain at days 2 / 3-7
- loin pain at days 2 / 3-7
- smelly urine at days 2 / 3-7
- duration of UTI symptoms

- febrile UTI within 45 days
- symptom relapse
- recurrent UTI
- symptom relapse or recurrence
- pyelonephritis within 28 days
- C-reactive Proteine (CRP) during follow-up
- leukocytes in urine during follow-up
- erythrocytes in urine during follow-up
- nitrite in urine during follow-up
- urine culture results during follow-up
- bacterial strains in urine during follow-up
- antibiotic treatment during follow-up within 45 days
- number of antibiotic courses
- antibiotic side effects within 45 days
- adverse events within 45 days
- follow-up time
- reason for loss to follow-up
